# Supplementary material for: Genome-Wide Expression Analysis of Soybean MADS Genes Showing Potential Function in the Seed Development
Source: PLoS One. 2013 Apr 30;8(4):e62288. doi: 10.1371/journal.pone.0062288 (PMC3640087; doi:10.1371/journal.pone.0062288)
Supplement: Table S7 — The information of MADS family in A. thaliana , M. truncatula and V. vinifera. (XLSX) [file pone.0062288.s014.xlsx]

## Sheet: Sheet1
Table S7 Information of MADS genes in Arabidopsis, Medicago truncatula, Vitis vinifera,Oryza sativa
The MADS family in Arabidopsis				The MADS family in Medicago truncatula						The MADS family in Vitis vinifera						The MADS family in Oryza sativa
							Best match with Arabidopsis						Best match with Arabidopsis						Best match with Arabidopsis
Family	Locus Name	Gene Name		Family	Gene	Locus Name	Arabidopsis	E-value		Family	Gene name	Locus name	Arabidopsis	E-Value		Family	Gene name	Locus name	Arabidopsis	E-Value
MIKCc	AT1G24260.2	SEP3		MIKCc	MtMADS01	Medtr3g005530	AT4G09960, STK,	7e-94		MIKCc	VvAG1	GSVIVT01000802001	AT3G58780, SHP1, AGL1	1e-92		MIKCc	OsMADS1	LOC_Os03g11614	AT5G15800, SEP1, AGL2	6e-65
MIKCc	AT1G26310.1	CAL		MIKCc	MtMADS02	Medtr3g084980	AT1G24260, SEP3, AGL9	4e-101		MIKCc	VvAG2	GSVIVT01021303001	AT4G18960, AG	5e-97		MIKCc	OsMADS2	LOC_Os01g66030	AT5G20240.1, PI	1e-59
MIKCc	AT1G31140.2	GOA		MIKCc	MtMADS03	Medtr7g016600	AT5G15800, SEP1, AGL2	1e-103		MIKCc	VvAG3	GSVIVT01025945001	AT4G09960, STK,	2e-93		MIKCc	OsMADS3	LOC_Os01g10504	AT4G18960, AG	2e-81
MIKCc	AT1G69120.1	AP1		MIKCc	MtMADS04	Medtr8g097090	AT1G24260, SEP3, AGL9	2e-95		MIKCc	VvAGL12	GSVIVT01025916001	AT1G71692, AGL12,	3e-67		MIKCc	OsMADS4	LOC_Os05g34940	AT5G20240.1, PI	6e-58
MIKCc	AT1G71692.1	AGL12		MIKCc	MtMADS06	Medtr8g087860	AT4G18960, AG	2e-90		MIKCc	VvAGL15.1	GSVIVT01001437001	AT5G13790, AGL15	2e-68		MIKCc	OsMADS47	LOC_Os03g08754	AT2G22540, SVP, AGL22	3e-65
MIKCc	AT1G77080.4	MAF1		MIKCc	MtMADS07	Medtr8g066260	AT1G69120, AP1, AGL7	7e-101		MIKCc	VvAGL15.2	GSVIVT01033253001	AT5G13790, AGL15	5e-49		MIKCc	OsMADS5	LOC_Os06g06750	AT1G24260, SEP3, AGL9	2e-61
MIKCc	AT2G03710.1	SEP4		MIKCc	MtMADS08	Medtr7g075870	AT2G45660, AGL20, SOC1	5e-75		MIKCc	VvAGL17.1	GSVIVT01009219001	AT3G57230, AGL16	3e-83		MIKCc	OsMADS6	LOC_Os02g45770	AT2G45650.1, AGL6	1e-78
MIKCc	AT2G14210.1	AGL44		MIKCc	MtMADS09	Medtr7g075850	AT2G45650, AGL6	3e-86		MIKCc	VvAGL17.2	GSVIVT01038474001	AT2G14210, ANR1, AGL44	2e-81		MIKCc	OsMADS7/45	LOC_Os08g41950	AT1G24260, SEP3, AGL9	2e-69
MIKCc	AT2G22540.1	SVP		MIKCc	MtMADS11	Medtr5g046790	AT1G69120, AP1, AGL7	9e-82		MIKCc	VvAGL6	GSVIVT01027577001	AT2G45650, AGL6	6e-93		MIKCc	OsMADS8/24	LOC_Os09g32948	AT1G24260, SEP3, AGL9	1e-74
MIKCc	AT2G22630.1	AGL17		MIKCc	MtMADS12	Medtr5g021270	AT3G54340, AP3,	8e-56		MIKCc	VvAP1	GSVIVT01012250001	AT1G69120, AP1, AGL7	1e-98		MIKCc	OsMADS13	LOC_Os12g10540	AT4G18960, AG	8e-68
MIKCc	AT2G42830.2	SHP2		MIKCc	MtMADS13	Medtr3g113030	AT3G54340, AP3,	6e-75		MIKCc	VvAP3.1	GSVIVT01009815001	AT3G54340, AP3,	1e-76		MIKCc	OsMADS14	LOC_Os03g54160	AT1G69120, AP1, AGL7	6e-74
MIKCc	AT2G45650.1	AGL6		MIKCc	MtMADS14	Medtr2g009840	AT2G14210, ANR1, AGL44	4e-28		MIKCc	VvBS1	GSVIVT01026207001	AT5G23260, ABS	4e-65		MIKCc	OsMADS15	LOC_Os07g01820	AT1G69120, AP1, AGL7	4e-67
MIKCc	AT2G45660.1	AGL20		MIKCc	MtMADS15	Medtr5g032520	AT2G22540, SVP, AGL22	5e-88		MIKCc	VvBS2	GSVIVT01012110001	AT5G23260, ABS	1e-62		MIKCc	OsMADS16	LOC_Os06g49840	AT3G54340, AP3,	6e-53
MIKCc	AT3G02310.1	SEP2		MIKCc	MtMADS16	Medtr5g032150	AT2G22540, SVP, AGL22	2e-85		MIKCc	VvFLC2	GSVIVT01033067001	AT1G69120, AP1, AGL7	3e-36		MIKCc	OsMADS17	LOC_Os04g49150	AT2G45650.1, AGL6	4e-73
MIKCc	AT3G30260.1	AGL79		MIKCc	MtMADS17	Medtr1g101970	AT2G45650, AGL6	2e-41		MIKCc	VvFUL	GSVIVT01008140001	AT5G60910, AGL8, FUL	4e-79		MIKCc	OsMADS18/28	LOC_Os07g41370	AT5G60910, AGL8, AT5G60910, AGL8, FUL	6e-65
MIKCc	AT3G54340.1	AP3		MIKCc	MtMADS18	Medtr5g066180	AT2G22540, SVP, AGL22	4e-50		MIKCc	VvFUL-L	GSVIVT01036549001	AT1G69120, AP1, AGL7	2e-79		MIKCc	OsMADS20	LOC_Os12g31748	AT5G60910, AGL8, AT5G60910, AGL8, FUL	3e-47
MIKCc	AT3G57230.1	AGL16		MIKCc	MtMADS19	Medtr7g016630	AT5G60910.1, FUL(AGL8)	5e-60		MIKCc	VvPI	GSVIVT01008806001	AT5G20240, PI	7e-54		MIKCc	OsMADS21	LOC_Os01g66290	AT4G18960, AG	8e-71
MIKCc	AT3G57390.1	AGL18		MIKCc	MtMADS21	Medtr5g066960	AT2G14210, ANR1, AGL44	1e-26		MIKCc	VvSEP1	GSVIVT01036551001	AT5G15800, SEP1, AGL2	e-104		MIKCc	OsMADS22	LOC_Os02g52340	AT2G22540, SVP, AGL22	4e-64
MIKCc	AT3G58780.3	SHP		MIKCc	MtMADS22	Medtr5g031000	AT4G37940, AGL21	3e-75		MIKCc	VvSEP2	GSVIVT01008139001	AT5G15800, SEP1, AGL2	6e-85		MIKCc	OsMADS23	LOC_Os08g33488	AT2G14210, ANR1, AGL44	3e-58
MIKCc	AT3G61120.1	AGL13		MIKCc	MtMADS25	Medtr4g093970	AT4G24540.1, AGL24	3e-50		MIKCc	VvSEP3	GSVIVT01010521001	AT1G24260, SEP3, AGL9	e-102		MIKCc	OsMADS25	LOC_Os04g23910	AT3G57230.1, AGL16	2e-64
MIKCc	AT4G09960.3	STK		MIKCc	MtMADS05	Medtr5g046870	AT2G03710.1 SEP4(AGL3)	1e-29		MIKCc	VvSEP4	GSVIVT01012249001	AT5G15800, SEP1, AGL2	2e-87		MIKCc	OsMADS26	LOC_Os08g02070	AT1G71692.1, AGL12	2e-55
MIKCc	AT4G11880.1	AGL14		MIKCc	MtMADS20	Medtr4g093030	AT2G14210, ANR1, AGL44	3e-30		MIKCc	VvSOC1.1	GSVIVT01027579001	AT2G45660, AGL20, SOC1	2e-79		MIKCc	OsMADS27	LOC_Os02g36924	AT3G57230.1, AGL16	3e-79
MIKCc	AT4G18960.1	AG		MIKCc	MtMADS26	Medtr1g038300	AT5G23260, ABS	2e-50		MIKCc	VvSOC1.2	GSVIVT01018446001	AT5G62165, AGL42	9e-68		MIKCc	OsMADS29	LOC_Os02g07430	AT5G23260, ABS	4e-41
MIKCc	AT4G22950.1	AGL19		MIKCc	MtMADS28	Medtr4g093370	AT2G14210, ANR1, AGL44	1e-22		MIKCc	VvSOC1.3	GSVIVT01019883001	AT4G22950, AGL19,	2e-56		MIKCc	OsMADS30	LOC_Os06g45650	AT1G69120, AP1, AGL7	1e-34
MIKCc	AT4G24540.1	AGL24		MIKCc	MtMADS49	Medtr3g080940	AT2G24840, AGL61,	5e-49		MIKCc	VvSVP1	GSVIVT01005934001	AT2G22540, SVP, AGL22	9e-94		MIKCc	OsMADS31	LOC_Os04g52410	AT5G23260, ABS	5e-36
MIKCc	AT4G37940.1	AGL21		MIKCc	MtMADS78	Medtr3g014350	AT2G42830.2, SHP2(AGL5)	9e-08		MIKCc	VvSVP2	GSVIVT01009171001	AT2G22540, SVP, AGL22	5e-79		MIKCc	OsMADS32	LOC_Os01g52680	AT5G60910, AGL8, FUL	6e-28
MIKCc	AT5G10140.1	FLC		MIKCc	MtMADS10	Medtr2g077770	AT5G13790, AGL15	2e-23		MIKCc	VvSVP3	GSVIVT01011300001	AT2G22540, SVP, AGL22	5e-56		MIKCc	OsMADS33	LOC_Os12g10520	AT1G71692.1, AGL12	4e-53
MIKCc	AT5G13790.1	AGL15		MIKC*	MtMADS23	AC232874_1024	AT1G22130, AGL104	6e-46		MIKCc	VvSVP4	GSVIVT01015641001	AT2G22540, SVP, AGL22	1e-62		MIKCc	OsMADS34	LOC_Os03g54170	AT5G15800, SEP1, AGL2	6e-62
MIKCc	AT5G15800.2	SEP1		MIKC*	MtMADS24	AC235748_1025	AT1G22130, AGL104	6e-46		MIKCc	VvSVP5	GSVIVT01001701001	AT2G22540, SVP, AGL22	2e-60		MIKCc	OsMADS37	LOC_Os08g41960	AT2G03710.1 SEP4(AGL3)	2e-26
MIKCc	AT5G20240.1	PI		MIKC*	MtMADS52	Medtr5g041650	AT1G18750, AGL65	2e-67		MIKCc	VvTM8	GSVIVT01008560001	AT2G45660, AGL20, SOC1	4e-42		MIKCc	OsMADS50	LOC_Os03g03100	AT4G11880.1, AGL14	1e-28
MIKCc	AT5G23260.2	AGL32		MIKC*	MtMADS81	Medtr5g061750	AT1G77980.1, AGL66	2e-36		MIKCc	VvMADS55	GSVIVT01019167001	AT4G24540.1, AGL24	7e-24		MIKCc	OsMADS55	LOC_Os06g11330	AT2G22540, SVP, AGL22	4e-55
MIKCc	AT5G51860.1	AGL72		Mα	MtMADS29	Medtr1g108580	AT5G60440, AGL62	1e-47		MIKCc	VvMADS56	GSVIVT01019180001	AT4G24540.1, AGL24	5e-25		MIKCc	OsMADS56	LOC_Os10g39130	AT4G22950.1, AGL19	5e-59
MIKCc	AT5G51870.3	AGL71		Mα	MtMADS30	Medtr1g012570	AT5G60440, AGL62	2e-49		MIKCc	VvMADS57	GSVIVT01002442001	AT4G24540.1, AGL24	4e-24		MIKCc	OsMADS57	LOC_Os02g49840	AT3G57230.1, AGL16	1e-70
MIKCc	AT5G60910.1	AGL8		Mα	MtMADS33	Medtr1g075600	AT5G60440, AGL62	7e-45		MIKCc	VvMADS58	GSVIVT01003861001	AT4G37940, AGL21	4e-81		MIKCc	OsMADS58	LOC_Os05g11414	AT4G18960, AG	8e-75
MIKCc	AT5G62165.1	AGL42		Mα	MtMADS34	Medtr8g086290	AT5G60440, AGL62	2e-32		MIKCc	VvMADS59	GSVIVT01003864001	AT4G37940, AGL21	1e-81		MIKCc	OsMADS59	LOC_Os06g23950	AT2G14210, ANR1, AGL44	6e-25
MIKCc	AT5G65050.3	AGL31		Mα	MtMADS47	Medtr4g131030	AT2G34440.1, AGL29	7e-32		MIKCc	VvMADS60	GSVIVT01018450001	AT2G45650, AGL6	7e-65		MIKCc	OsMADS61	LOC_Os04g38770	AT4G37940.1, AGL21	2e-36
MIKCc	AT5G65060.1	MAF3		Mα	MtMADS53	Medtr1g075570	AT5G60440, AGL62	9e-34		MIKCc	VvMADS61	GSVIVT01019630001	AT5G23260, ABS	2e-37		MIKCc	OsMADS64	LOC_Os04g31804	AT3G30260.1, AGL79	6e-20
MIKCc	AT5G65070.3	MAF4		Mα	MtMADS54	Medtr3g030780	AT5G60440, AGL62	1e-35		MIKC*	VvMADS62	GSVIVT01022182001	AT1G22130, AGL104	4e-80		MIKCc	OsMADS65	LOC_Os01g69850	AT3G30260.1, AGL79	8e-26
MIKCc	AT5G65080.1	MAF5		Mα	MtMADS57	Medtr1g108500	AT5G60440, AGL62	5e-22		MIKC*	VvMADS63	GSVIVT01009393001	AT1G22130, AGL104	6e-46		MIKCc	OsMADS66	LOC_Os05g11380	AT4G18960, AG	2e-44
MIKC*	AT1G18750.1	AGL65		Mα	MtMADS27	Medtr2g030740	AT5G60440, AGL62	1e-49		MIKC*	VvMADS64	GSVIVT01035477001	AT2G03060.1, AGL30	3e-29		MIKCc	OsMADS94	LOC_Os01g23770	AT1G71692.1, AGL12	6e-07
MIKC*	AT1G22130.1	AGL104		Mα	MtMADS31	Medtr1g108510	AT5G60440, AGL62	2e-50		MIKC*	VvMADS65	GSVIVT01007989001	AT1G18750, AGL65	6e-98		MIKCc	OsMADS95	LOC_Os01g23780	AT5G65080.1, MAF5	3e-05
MIKC*	AT1G69540.1	AGL94		Mα	MtMADS32	Medtr3g030770	AT5G60440, AGL62	2e-50		MIKC*	VvMADS66	GSVIVT01000175001	AT1G77980.1, AGL66	3e-21		MIKC*	OsMADS68	LOC_Os11g43740	AT1G18750.1, AGL65	2e-70
MIKC*	AT1G77950.1	AGL67		Mα	MtMADS35	Medtr5g045560	AT5G60440, AGL62	2e-46		MIKC*	VvMADS67	GSVIVT01008980001	AT1G77980.1, AGL66	6e-28		MIKC*	OsMADS62	LOC_Os08g38590	AT1G77980.1, AGL66	1e-47
MIKC*	AT1G77980.1	AGL66		Mα	MtMADS36	Medtr8g043650	AT5G60440, AGL62	1e-53		MIKC*	VvMADS68	GSVIVT01014093001	AT1G77980.1, AGL66	4e-24		MIKC*	OsMADS63	LOC_Os06g11970	AT1G77980.1, AGL66	4e-60
MIKC*	AT2G03060.2	AGL30		Mα	MtMADS37	Medtr8g043860	AT5G60440, AGL62	1e-53		Mα	VvMADS69	GSVIVT01006592001	AT2G24840, AGL61,	2e-33		Mα	OsMADS73	LOC_Os12g21850	AT1G17310, AGL100	7e-26
MIKC*	AT2G26320.1	AGL33		Mα	MtMADS38	Medtr2g093190	AT5G60440, AGL62	4e-49		Mα	VvMADS70	GSVIVT01037026001	AT2G24840, AGL61,	6e-45		Mα	OsMADS91	LOC_Os01g11510	AT1G01530.1, AGL28	2e-09
Mα	AT1G01530.1	AGL28		Mα	MtMADS39	Medtr2g084920	AT5G60440, AGL62	3e-46		Mα	VvMADS71	GSVIVT01010218001	AT5G60440, AGL62	8e-35		Mα	OsMADS72	LOC_Os03g14850	AT1G28460.1, AGL59	2e-13
Mα	AT1G17310.1	AGL100		Mα	MtMADS40	Medtr2g084950	AT5G60440, AGL62	3e-46		Mα	VvMADS72	GSVIVT01010221001	AT5G60440, AGL62	3e-41		Mα	OsMADS70	LOC_Os05g23780	AT2G24840, AGL61	2e-22
Mα	AT1G28450.1	AGL58		Mα	MtMADS41	Medtr2g085250	AT5G60440, AGL62	3e-46		Mα	VvMADS73	GSVIVT01021534001	AT5G60440, AGL62	5e-36		Mα	OsMADS71	LOC_Os06g22760	AT2G24840, AGL61	3e-26
Mα	AT1G28460.1	AGL59		Mα	MtMADS42	Medtr2g085280	AT5G60440, AGL62	2e-45		Mα	VvMADS74	GSVIVT01037022001	AT5G60440, AGL62	5e-43		Mα	OsMADS75	LOC_Os06g30810	AT2G24840, AGL61	2e-24
Mα	AT1G29962.1	AGL64		Mα	MtMADS43	Medtr6g091020	AT5G60440, AGL62	3e-46		Mα	VvMADS75	GSVIVT01037024001	AT5G60440, AGL62	2e-51		Mα	OsMADS76	LOC_Os06g30830	AT2G24840, AGL61	2e-20
Mα	AT1G46408.1	AGL97		Mα	MtMADS44	Medtr8g091240	AT5G60440, AGL62	1e-39		Mα	VvMADS76	GSVIVT01037031001	AT5G60440, AGL62	6e-54		Mα	OsMADS78	LOC_Os09g02830	AT2G24840, AGL61	2e-27
Mα	AT1G47760.1	AGL102		Mα	MtMADS45	Medtr5g055100	AT5G60440, AGL62	1e-45		Mα	VvMADS77	GSVIVT01037031001	AT5G60440, AGL62	6e-54		Mα	OsMADS79	LOC_Os01g74440	AT2G24840, AGL61	3e-25
Mα	AT1G48150.1	AGL74		Mα	MtMADS46	AC233655_23	AT5G60440, AGL62	1e-30		Mγ	VvMADS78	GSVIVT01031333001	AT5G48670, AGL80,	5e-64		Mα	OsMADS90	LOC_Os07g04170	AT2G24840, AGL61	1e-11
Mα	AT1G54760.1	AGL85		Mα	MtMADS48	Medtr4g127140	AT5G60440, AGL62	6e-29								Mα	OsMADS74	LOC_Os12g21880	AT5G60440, AGL62	2e-16
Mα	AT1G60880.1	AGL56		Mα	MtMADS50	Medtr5g053390	AT5G60440, AGL62	1e-45								Mα	OsMADS77	LOC_Os09g02780	AT5G60440, AGL62	6e-13
Mα	AT1G60920.1	AGL55		Mα	MtMADS51	Medtr8g051580	AT3G66656.1, AGL91	1e-29								Mα	OsMADS80	LOC_Os02g06860	AT5G60440, AGL62	4e-22
Mα	AT1G65360.1	AGL23		Mα	MtMADS56	Medtr8g046350	AT2G24840.1, DIA (AGL61)	1e-28								Mβ	OsMADS92	LOC_Os01g23750	AT3G18650.1, AGL103	3e-06
Mα	AT1G72350.1	AGL60		Mα	MtMADS69	Medtr8g022970	AT5G60440, AGL62	2e-19								Mβ	OsMADS97	LOC_Os01g68420	AT3G18650.1, AGL103	1e-10
Mα	AT2G24840.1	AGL61		Mα	MtMADS79	Medtr2g045020	AT5G60440, AGL62	4e-14								Mβ	OsMADS93	LOC_Os01g23760	AT5G58890.1, AGL82	4e-13
Mα	AT2G34440.1	AGL29		Mα	MtMADS83	AC233082_2	AT5G55690.1, AGL47	5e-10								Mγ	OsMADS98	LOC_Os01g68560	AT1G31630.1, AGL86	2e-16
Mα	AT3G04100.1	AGL57		Mα	MtMADS88	AC233082_22	AT3G04100.1, AGL57	0.94								Mγ	OsMADS81	LOC_Os04g24790	AT5G48670.1, AGL80	3e-21
Mα	AT3G66656.1	AGL91		Mβ	MtMADS61	Medtr1g115090	AT5G55690.1, AGL47	1e-24								Mγ	OsMADS82	LOC_Os04g24800	AT5G48670.1, AGL80	4e-21
Mα	AT4G36590.1	AGL40		Mβ	MtMADS59	Medtr6g005440	AT5G55690.1, AGL47	4e-25								Mγ	OsMADS83	LOC_Os04g24810	AT5G48670.1, AGL80	3e-22
Mα	AT5G04640.1	AGL99		Mβ	MtMADS75	Medtr6g005450	AT5G55690.1, AGL47	3e-22								Mγ	OsMADS84	LOC_Os04g25870	AT5G48670.1, AGL80	4e-21
Mα	AT5G27130.1	AGL39		Mβ	MtMADS80	Medtr2g049610	AT3G18650.1, AGL103	4e-12								Mγ	OsMADS85	LOC_Os04g25920	AT5G48670.1, AGL80	4e-19
Mα	AT5G38620.1	AGL73		Mβ	MtMADS84	AC233082_23	At5g26880.1, AGL26	0.34								Mγ	OsMADS86	LOC_Os03g37670	AT5G48670.1, AGL80	2e-22
Mα	AT5G49420.1	AGL84		Mγ	MtMADS62	Medtr4g031910	AT5G48670.1, AGL80	3e-47								Mγ	OsMADS87	LOC_Os03g38610	AT5G48670.1, AGL80	2e-33
Mα	AT5G49490.1	AGL83		Mγ	MtMADS63	Medtr4g032620	AT5G48670.1, AGL80	9e-47								Mγ	OsMADS88	LOC_Os01g18420	AT5G48670.1, AGL80	5e-31
Mα	AT5G60440.1	AGL62		Mγ	MtMADS64	Medtr3g031240	AT5G48670.1, AGL80	6e-29								Mγ	OsMADS89	LOC_Os01g18440	AT5G48670.1, AGL80	7e-34
Mβ	AT1G59810.1	AGL50		Mγ	MtMADS89	Medtr7g055930	AT5G48670.1, AGL80	5e-18								Mγ	OsMADS96	LOC_Os01g67890	AT5G48670.1, AGL80	5e-14
Mβ	AT1G60040.1	AGL49		Mγ	MtMADS55	Medtr3g031100	AT5G48670.1, AGL80	2e-32								Mγ	OsMADS99	LOC_Os04g25930	AT5G48670.1, AGL80	6e-14
Mβ	AT3G18650.1	AGL103		Mγ	MtMADS58	Medtr3g065100	AT5G48670.1, AGL80	8e-64
Mβ	AT4G02235.1	AGL51		Mγ	MtMADS60	AC231371_23	AT5G48670.1, AGL80	4e-34
Mβ	AT4G11250.1	AGL52		Mγ	MtMADS65	AC235664_9	AT1G65300.1, PHE2 (AGL38)	3e-33
Mβ	AT5G26880.1	AGL26		Mγ	MtMADS66	Medtr4g032110	AT5G48670.1, AGL80	9e-45
Mβ	AT5G26950.1	AGL93		Mγ	MtMADS67	Medtr4g032260	AT5G48670.1, AGL80	9e-45
Mβ	AT5G27050.1	AGL101		Mγ	MtMADS68	Medtr5g047580	AT5G26630.1, AGL35	3e-41
Mβ	AT5G27070.1	AGL53		Mγ	MtMADS70	Medtr1g084950	AT5G26630.1, AGL35	1e-37
Mβ	AT5G27090.1	AGL54		Mγ	MtMADS71	Medtr2g035610	AT5G48670.1, AGL80	2e-42
Mβ	AT5G27580.1	AGL89		Mγ	MtMADS72	Medtr2g035580	AT5G48670.1, AGL80	2e-32
Mβ	AT5G27944.1	AGL107		Mγ	MtMADS73	Medtr4g032290	AT5G48670.1, AGL80	2e-45
Mβ	AT5G37415.1	AGL105		Mγ	MtMADS74	Medtr4g028720	AT5G48670.1, AGL80	3e-36
Mβ	AT5G38740.1	AGL77		Mγ	MtMADS76	Medtr7g011950	AT5G48670.1, AGL80	3e-36
Mβ	AT5G39750.1	AGL81		Mγ	MtMADS77	Medtr5g075380	AT5G48670.1, AGL80	2e-35
Mβ	AT5G39810.1	AGL98		Mγ	MtMADS82	Medtr7g055790	AT5G26630.1, AGL35	2e-21
Mβ	AT5G40120.1	AGL76		Mγ	MtMADS90	Medtr7g055940	AT5G48670.1, AGL80	4e-16
Mβ	AT5G40220.1	AGL43		Mγ	MtMADS91	Medtr7g055800	AT5G48670.1, AGL80	8e-19
Mβ	AT5G41200.1	AGL75		Mγ	MtMADS93	Medtr5g024430	AT3G05860.1, AGL45	2e-11
Mβ	AT5G55690.1	AGL47		Mγ	MtMADS87	AC233082_20	AT5G48670.1, AGL80	0.18
Mβ	AT5G58890.1	AGL82		Mγ	MtMADS92	Medtr4g032270	AT5G48670.1, AGL80	4e-08
Mβ	AT5G65330.1	AGL78			MtMADS85	AC233082_25
Mγ	AT1G22590.2	AGL87			MtMADS86	AC233082_21
Mγ	AT1G31630.1	AGL86
Mγ	AT1G31640.1	AGL92
Mγ	AT1G33070.1	AGL108
Mγ	AT1G65300.1	AGL38
Mγ	AT1G65330.1	PHE1
Mγ	AT2G28700.1	AGL46
Mγ	AT2G40210.1	AGL48
Mγ	AT3G05860.1	AGL45
Mγ	AT5G06500.1	AGL96
Mγ	AT5G26580.1	AGL34
Mγ	AT5G26630.1	AGL35
Mγ	AT5G26650.1	AGL36
Mγ	AT5G27810.1	AGL106
Mγ	AT5G27960.1	AGL90
Mγ	AT5G48670.1	AGL80
Some grapevine MADS genes were named according to Diaz-Riquelme, et al (2009)
Reference: Diaz-Riquelme, J., Lijavetzky, D., Martinez-Zapater, J.M. and Carmona, M.J. (2009) Genome-wide analysis of MIKCC-type MADS box genes in grapevine. Plant Physiol, 149, 354-369.
